# Supplementary material for: A metabolic perspective of selection for fruit quality related to apple domestication and improvement
Source: PubMed Central journal article supplement (PMC10131461; doi:10.1186/s13059-023-02945-6), 2023-04-26
Supplement: 13059_2023_2945_MOESM1_ESM.pdf [file 13059_2023_2945_MOESM1_ESM.pdf]

Additional file 1: Fig. S1. Classification (a) and coefficient of variation (b) values for all metabolites detected in apple flesh. Coefficients of variations of each metabolite were independently calculated as follows:  $s/m$ , where ‘s’ and ‘m’ represent the standard deviation and mean of each metabolite in all accessions, respectively. Fig. S2. PCA analysis of all metabolite contents detected in other wild, *M. sieversii*, heirloom, and six apple cultivar groups.  $t[1]$  and  $t[2]$  represent the first and second principal component.  $R^2x[1]$  and  $R^2x[2]$  indicate the proportion of variance explained by  $t[1]$  and  $t[2]$ , respectively. The colored dots indicate different apple accessions and the ellipses indicate the 95% confidence interval for each data set. Fig. S3. Fruit weight, total tannin content and titratable acid content in apple accessions among *M. sieversii* group, low-weight ( $\leq 90$ ) domesticated group, and high-weight ( $\geq 300$ ) domesticated group. ‘\*’ indicates  $p \leq 0.05$  by *t*-test. Fig. S4. Manhattan plots of procyanidin C1, procyanidin B4, arecatannin B1, cinnamtannin D1 and procyanidin A2 contents by GWAS. Co-mapped regions of the soluble tannins were identified on Chr 16. Fig. S5. Differences between amino acid sequences of *MdMyb9* and MD15G1051400 were marked by highlighting. Fig. S6. Whole-genome screen for selective sweeps during apple domestication and improvement. The horizontal gray dotted lines indicate genome-wide thresholds that were estimated based on the top 5% of  $F_{st}$  values. Fig. S7. Manhattan plots of LPE 18:1 and LPE 18:1 (2n isomer) contents by GWAS. Co-mapped regions of LPE contents were identified on Chr 12.

Additional file 1: Fig. S1

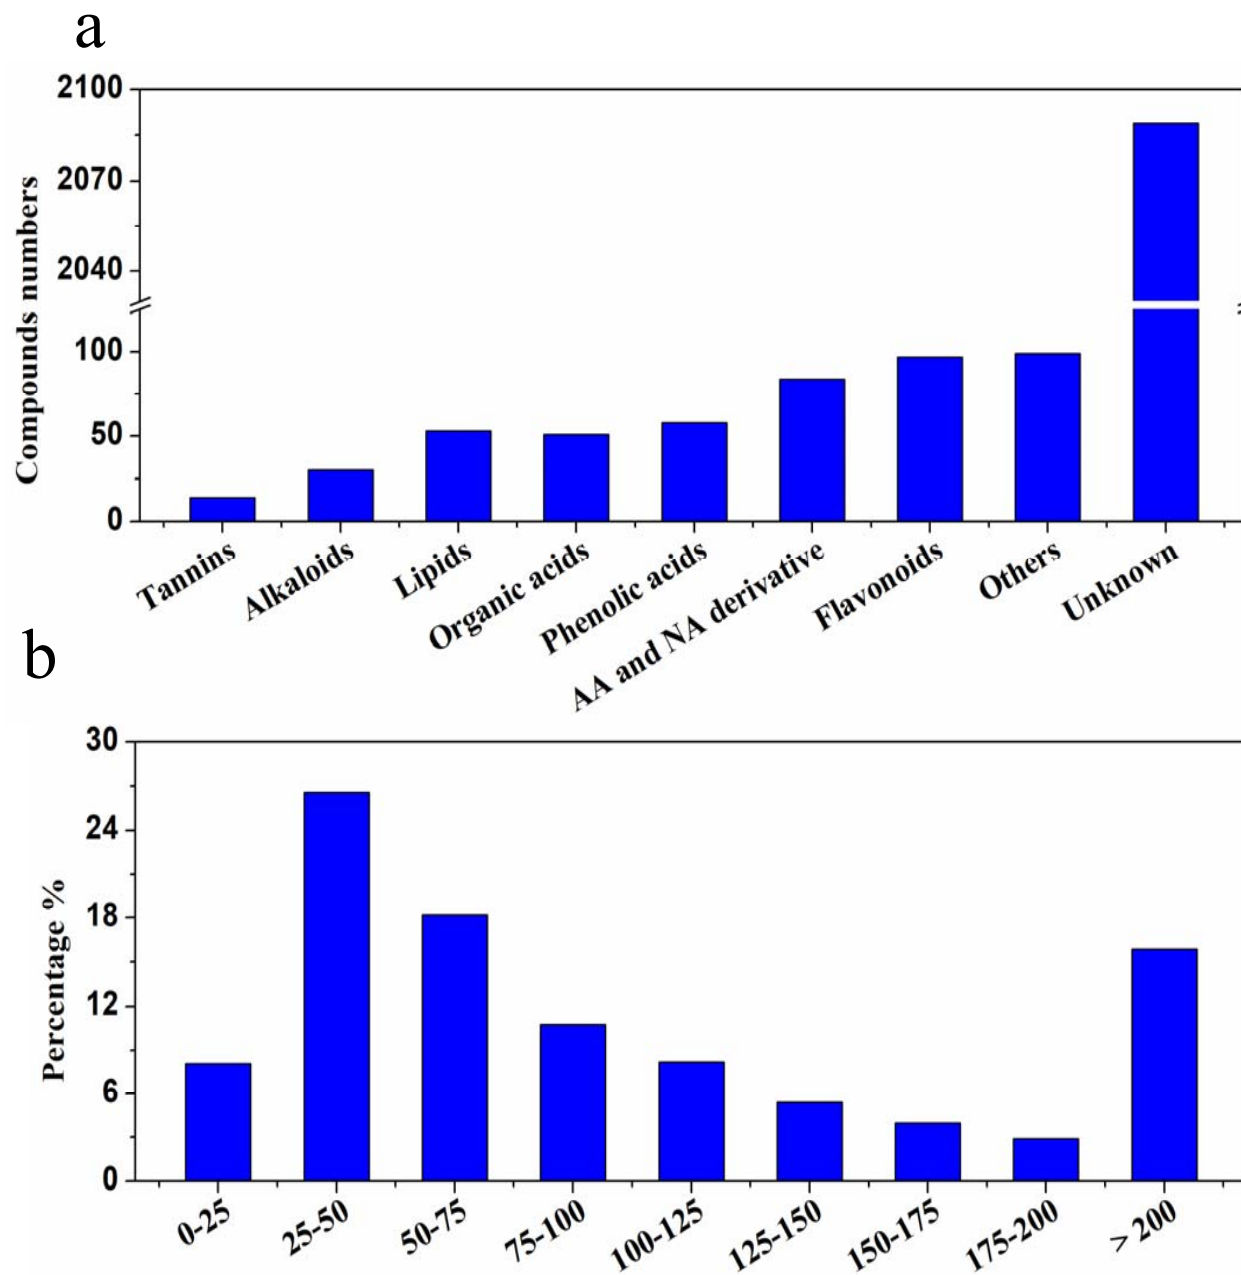

Additional file 1: Fig. S2

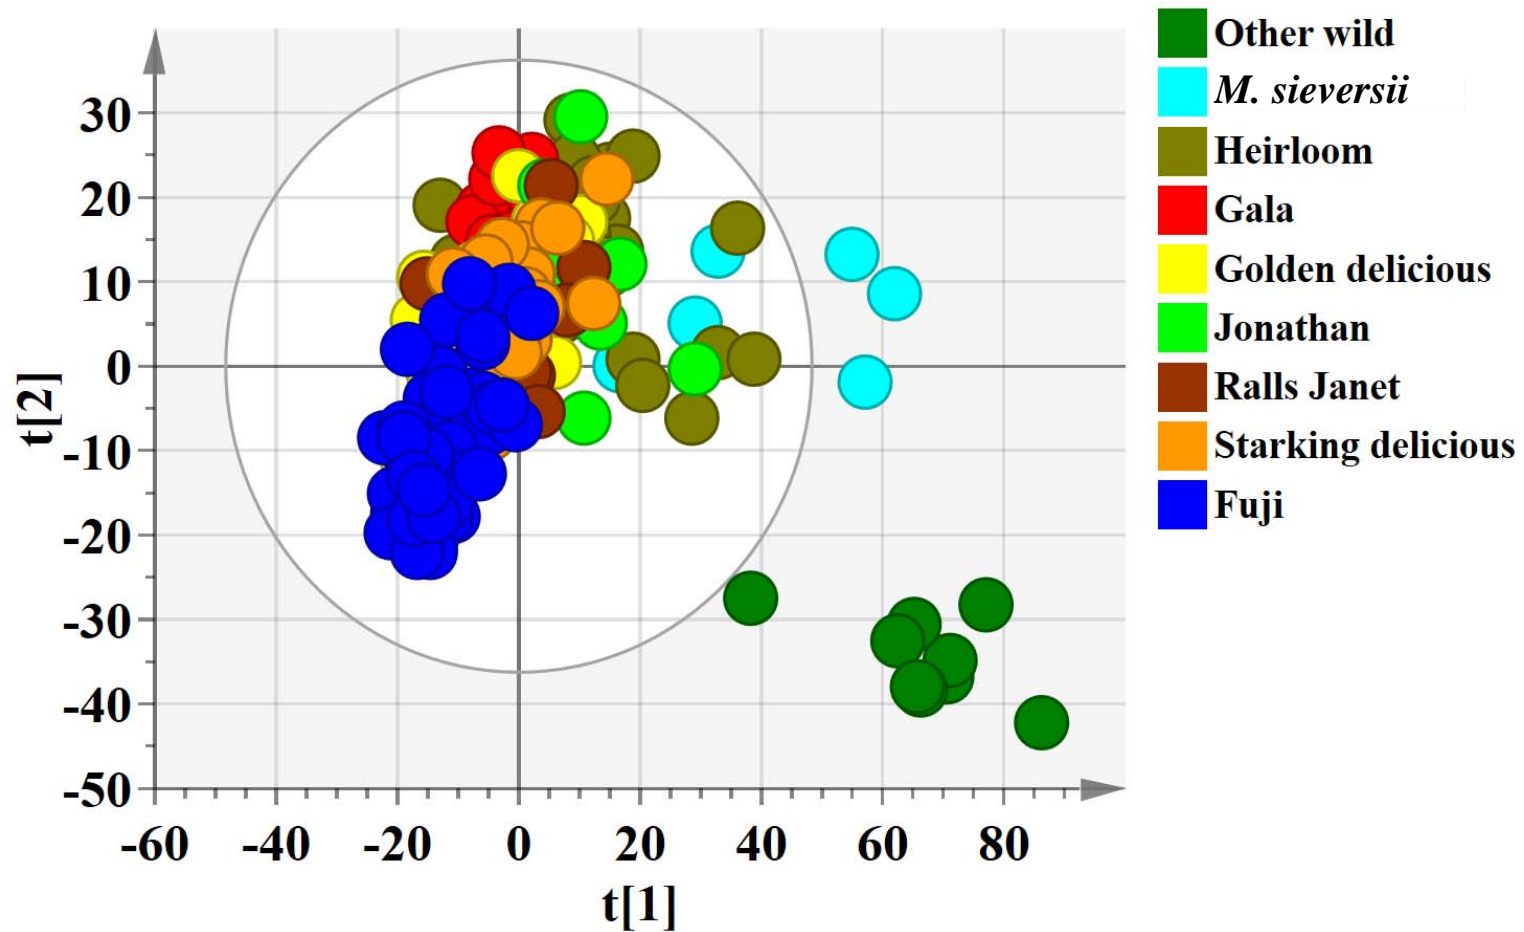

$R^2_{x[1]} = 0.177$        $R^2_{x[2]} = 0.090$

Ellipse: Hotelling's  $T^2$  (95%)

Additional file 1: Fig. S3

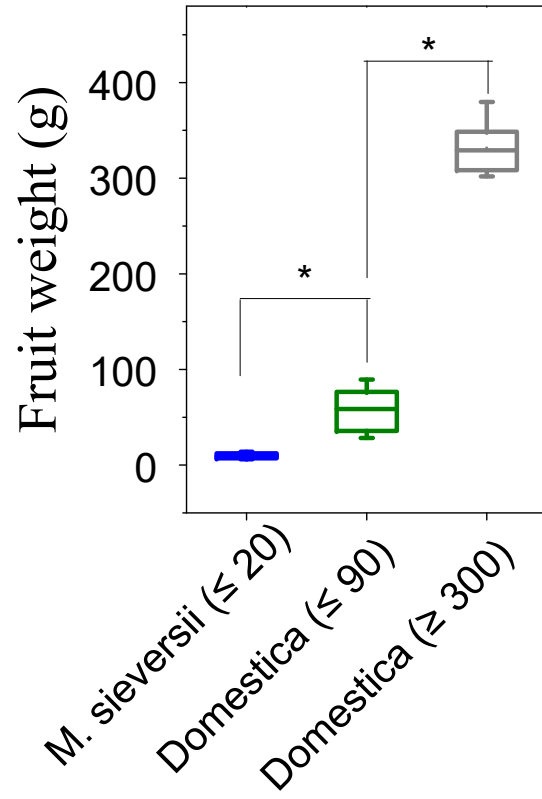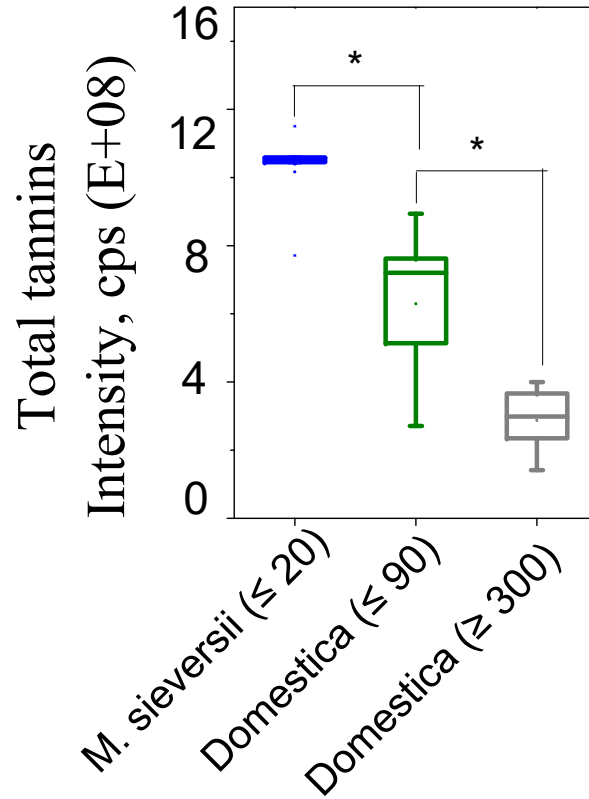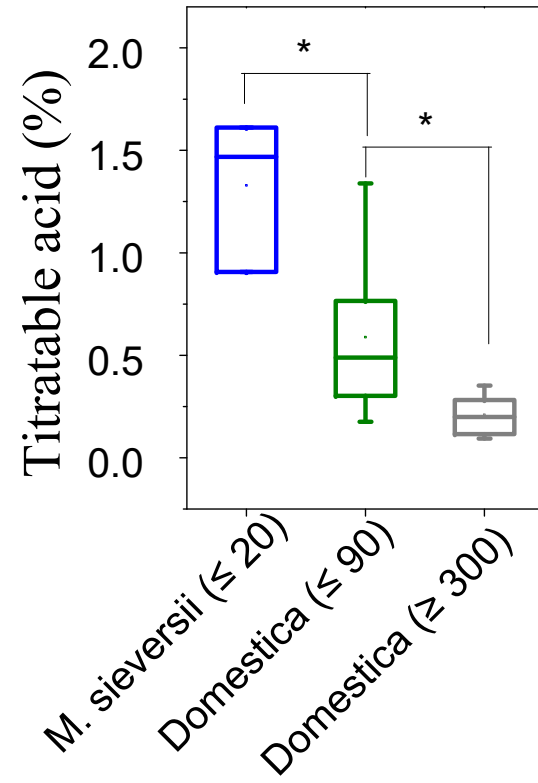

# Additional file 1: Fig. S4

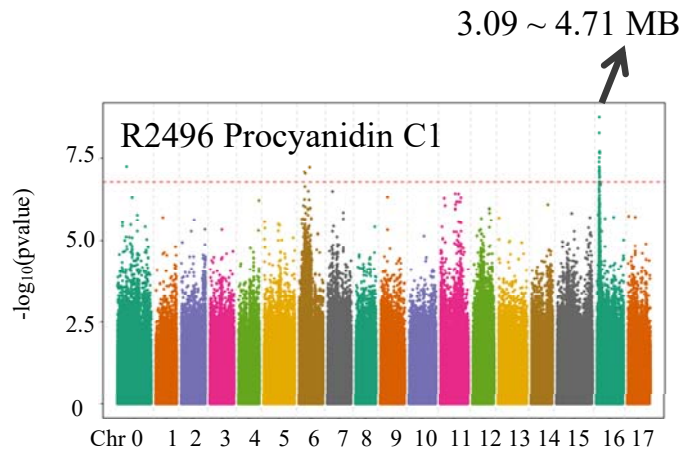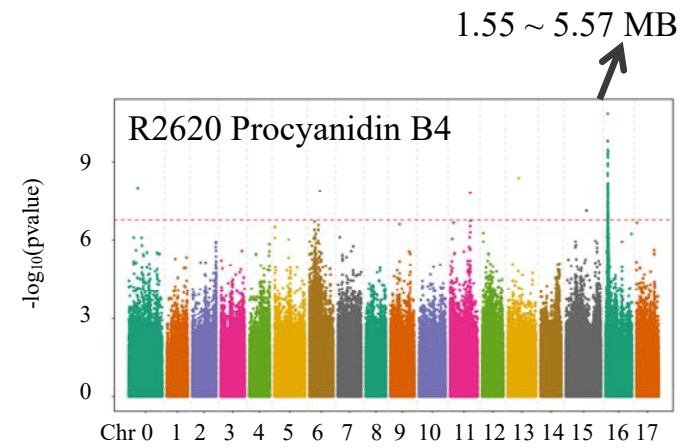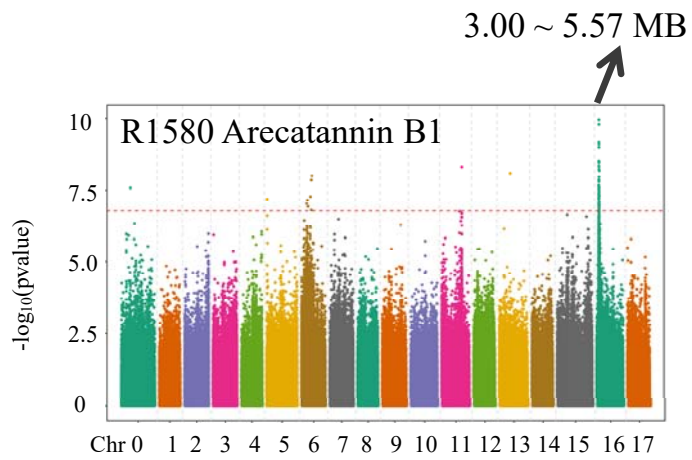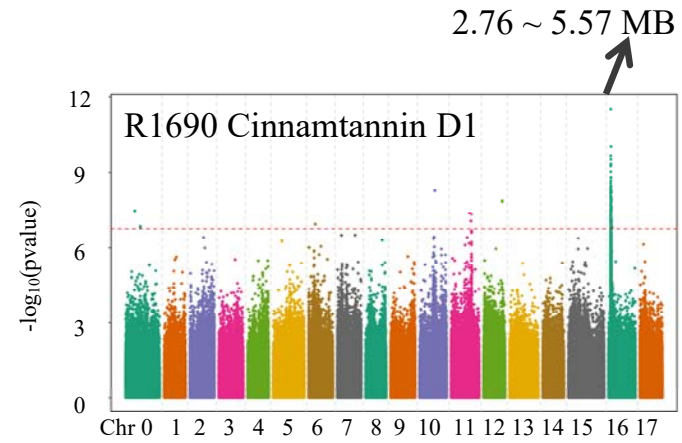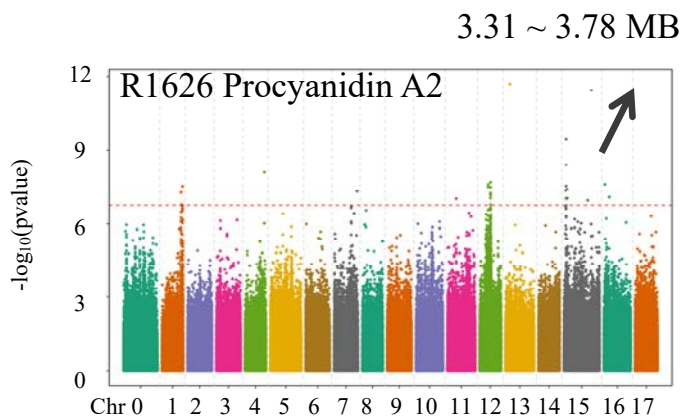

Additional file 1: Fig. S5

>MdMYB9

MGRSPCCSKEGLNRGAWTALEDKILSSYIKAHGEGKWRS LPKRAGLKRCGKSCRLRWLN  
YLRPDIKRGNISGDEEELIVRLHNLLGNRWSLIAGRLPGRTDNEIKNYWNTTLGKKSKVDS  
FSGSSKETS LNPCKSLAKKKDVESKT-STAAAQPLVIRTKATRLIKILVPQNIPSDENYTA AAA  
NP LELQTQSAEKGGSTEEFPRTNAGDCSNILKNFGCDDDDIDAKGDQYCNEFQLLNSIPLDE  
AMINDGCWTGGNGCDLEDYGASLDLDSLAFLLDSEEWPSQENVVV

>Myb9-like\_MD15G1051400

MGRSPCCSKEGLNRGAWTALEDKILTA YIKAHGEGKWRS LPKRAGLKRCGKSCRLRWLN  
YLRPDIKRGNISGDEEELIVRLHNLLGNRWSLIAGRLPGRTDNEIKNYWNTTLWKKSKADS  
PSGSSKETS QHPKSVVKKKDVESKTTSTAAAKPLVIRTKATRLSKILVPQNIPS-----  
-----QGRS-----  
-----  
-----

Additional file 1: Fig. S6

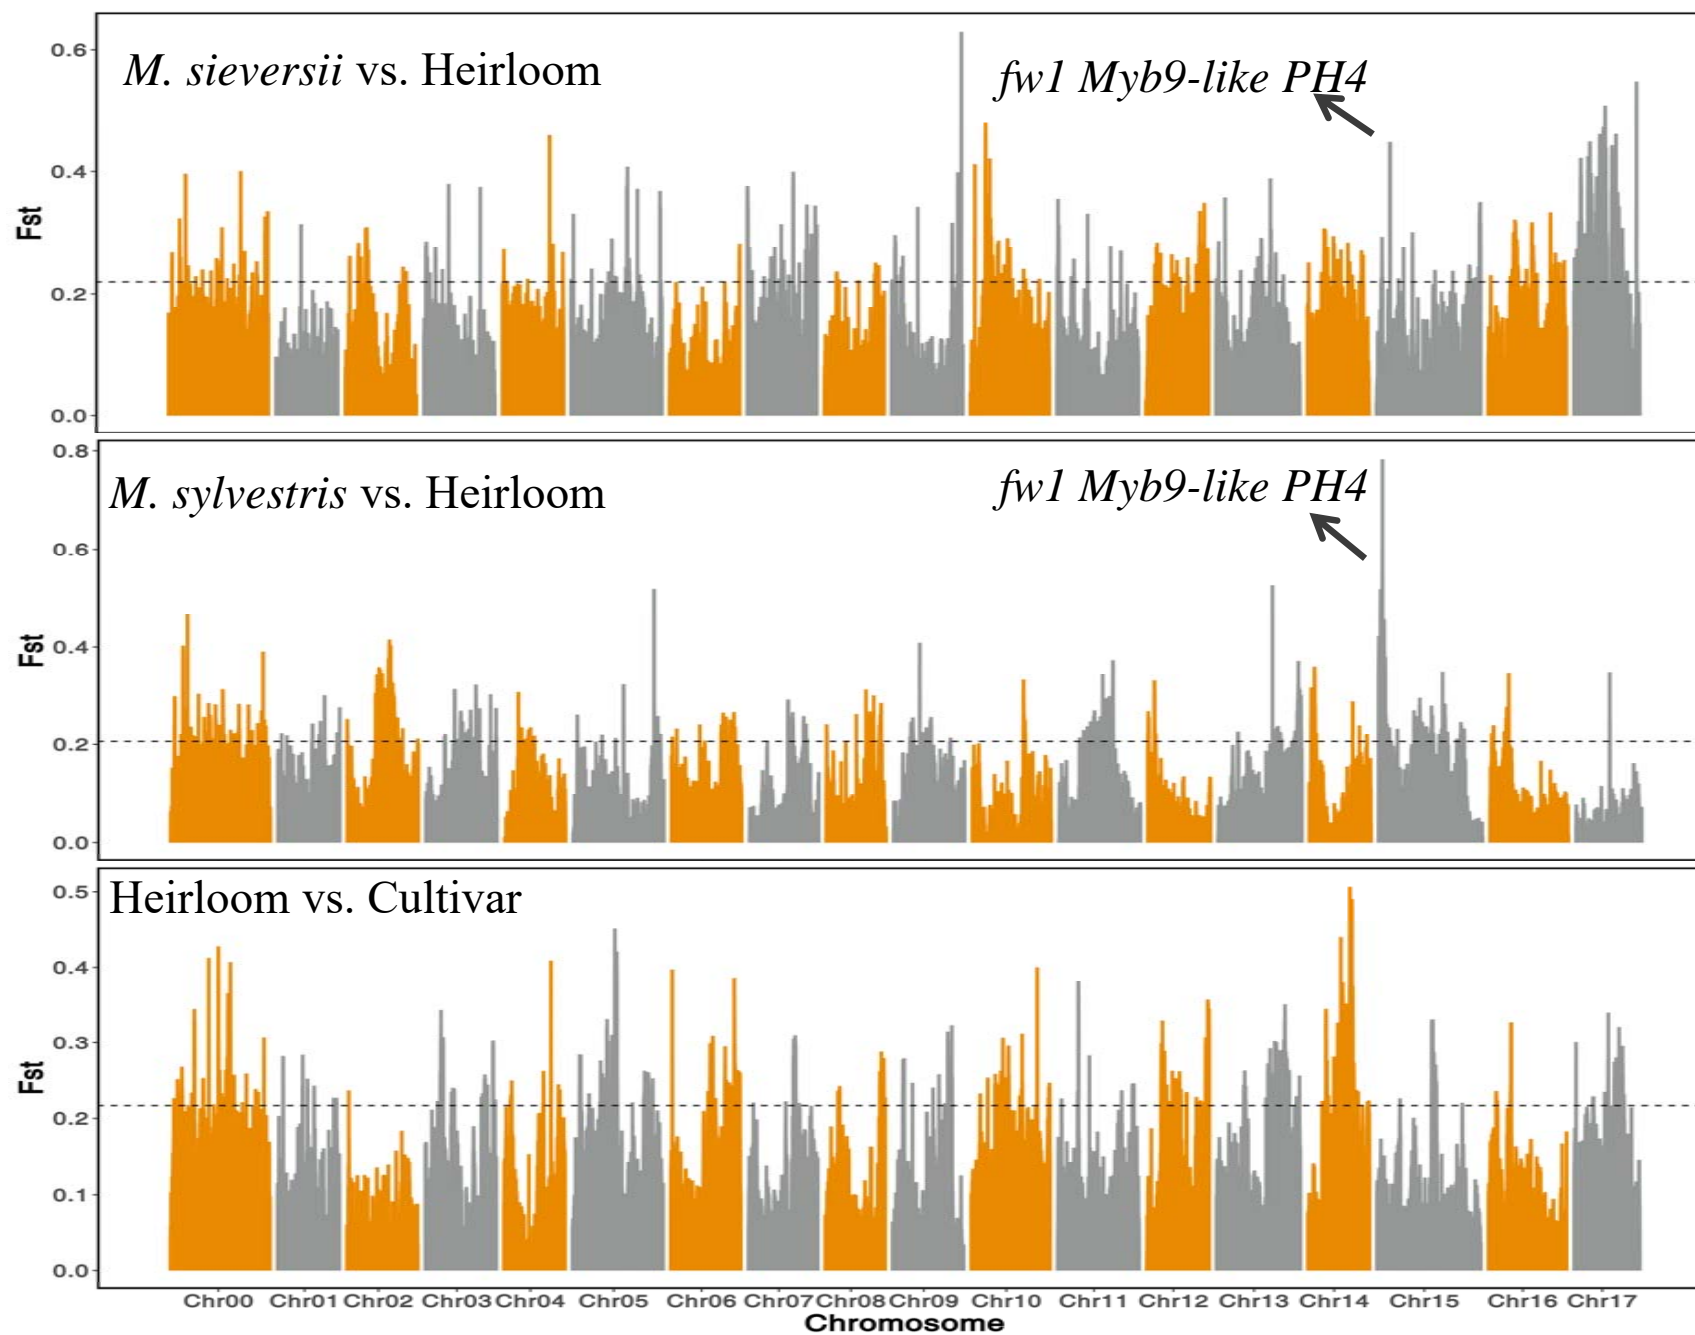



Additional file 1: Fig. S7

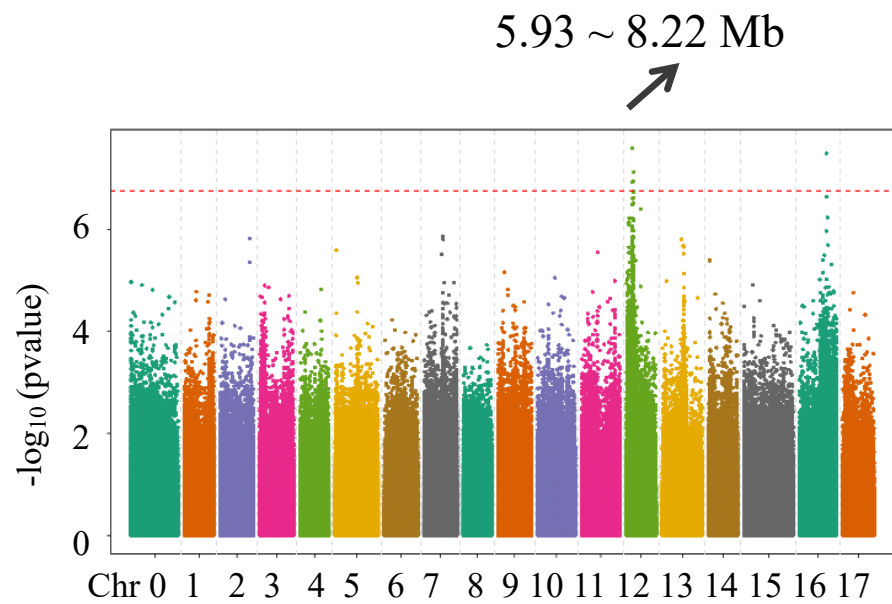

R2201 LPE 18:1

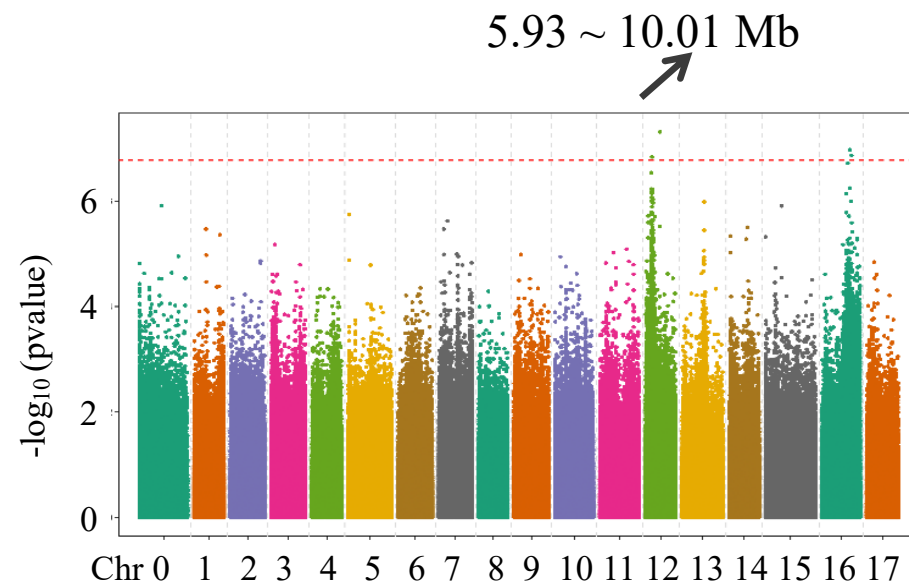

R1571 LPE 18:1 (2n isomer)
